# Supplementary material for: Atlantic Salmon (Salmo salar) Transfer to Seawater by Gradual Salinity Changes Exhibited an Increase in The Intestinal Microbial Abundance and Richness
Source: MDPI journal article supplement (doi:10.3390/microorganisms11010076), 2022-12-27
Supplement: s1 [file s1]

## Supplementary Figures

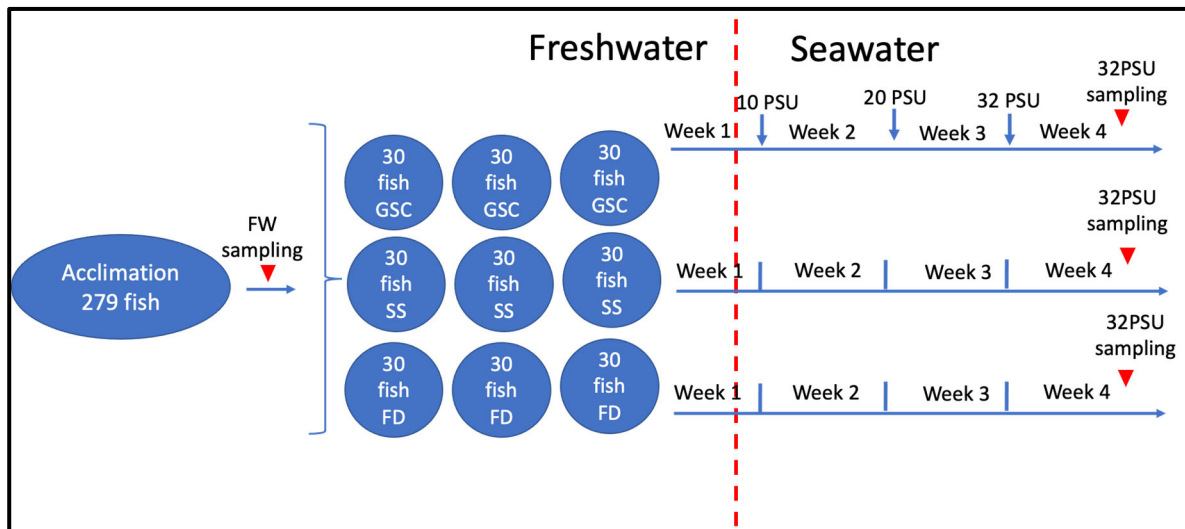

**Figure S1.** Experimental design for the Atlantic salmon transfer from FW to SW. After a month, all fish were acclimated in the same tank and were separated into three experimental groups: Gradual salinity change (GSC), salinity sock (SS), and functional diet (FD). The blue arrows indicate the salinity change performed in the GSC group. Sample points are indicated with a red arrow.

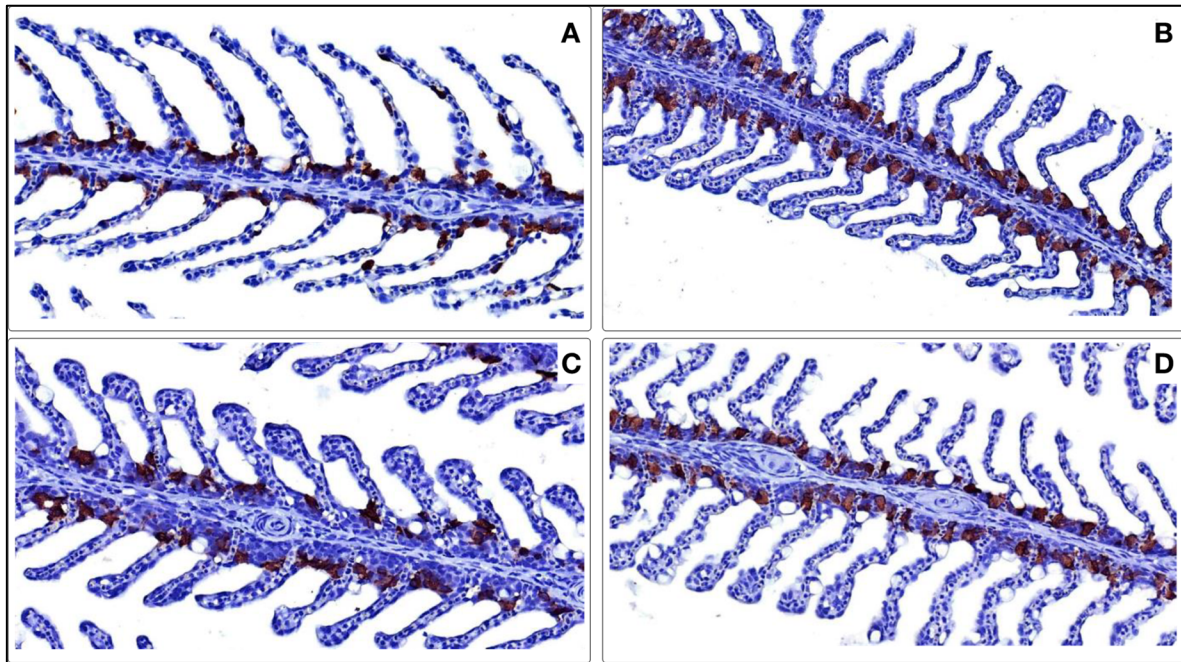

**Figure S2.** Localization of chloride cells in the gill filament epithelium. (A) Freshwater (FW) gills sample; (B) Gradual salinity change (GSC) 32 PSU; (C) Salinity shock (SS) 32 PSU; D) functional diet (FD) 32 PSU. A) Na<sup>+</sup>/K<sup>+</sup>-ATPase positive cells located in the middle region of the superficial interlamellar space and near the lamellar vascular axis. B-C Na<sup>+</sup>/K<sup>+</sup>-ATPase positive cell deeper in the epithelium.

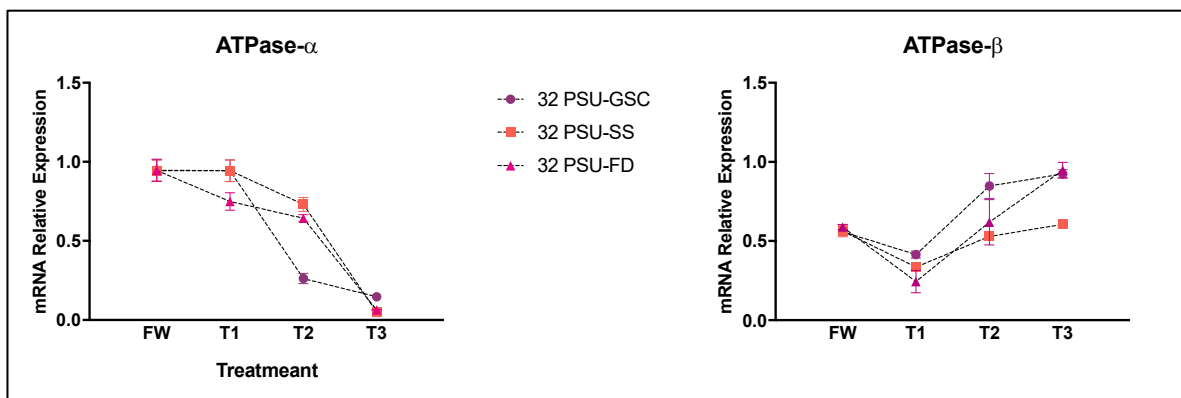

**Figure S3.** RT-qPCR analysis of ATPase- $\alpha$  and ATPase- $\beta$  subunits. FW: Freshwater previous treatment group; GSC: gradual salinity change at 10 PSU, 20 PSU, and 32 PSU groups; 32PSU-SS Salinity shock at 32-PSU group; 32PSU-FD: Salinity shock at 32 PSU group previously feeding with a functional diet.

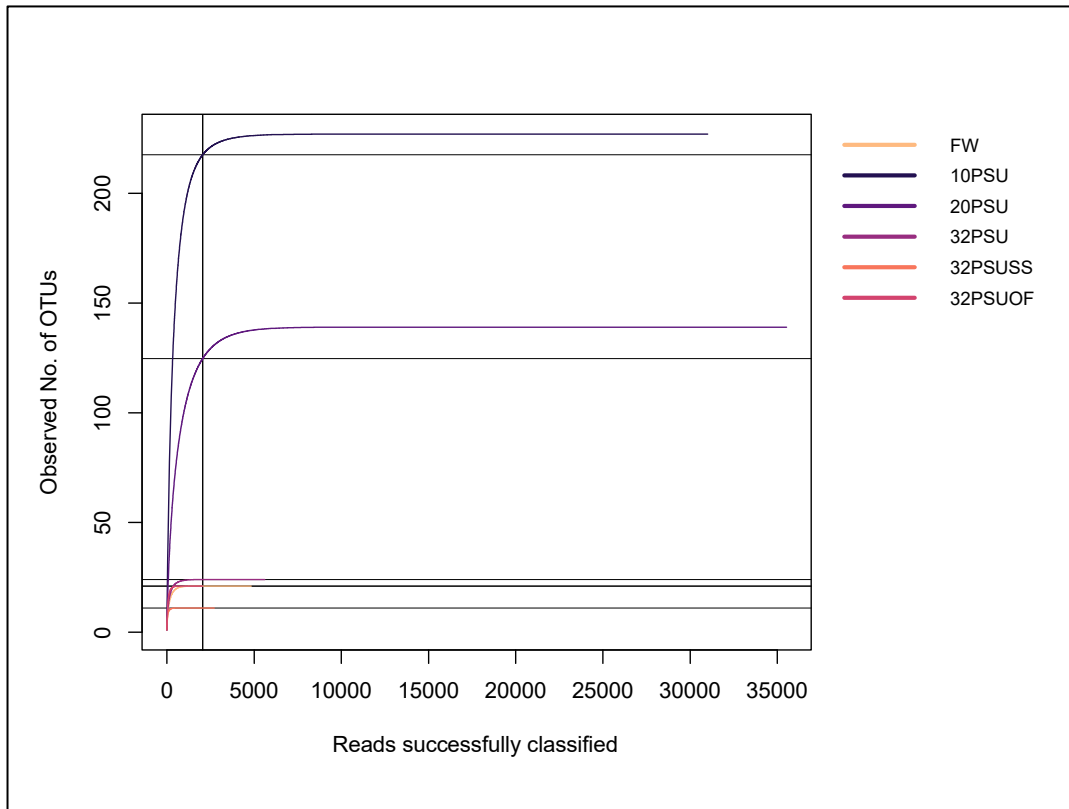

**Figure S4.** Rarefaction curve. FW: Freshwater previous treatment group; GSC: gradual salinity change at 10 PSU, 20 PSU, and 32 PSU groups; 32PSU-SS Salinity shock at 32-PSU group; 32PSU-FD: Salinity shock at 32 PSU group previously feeding with a functional diet.

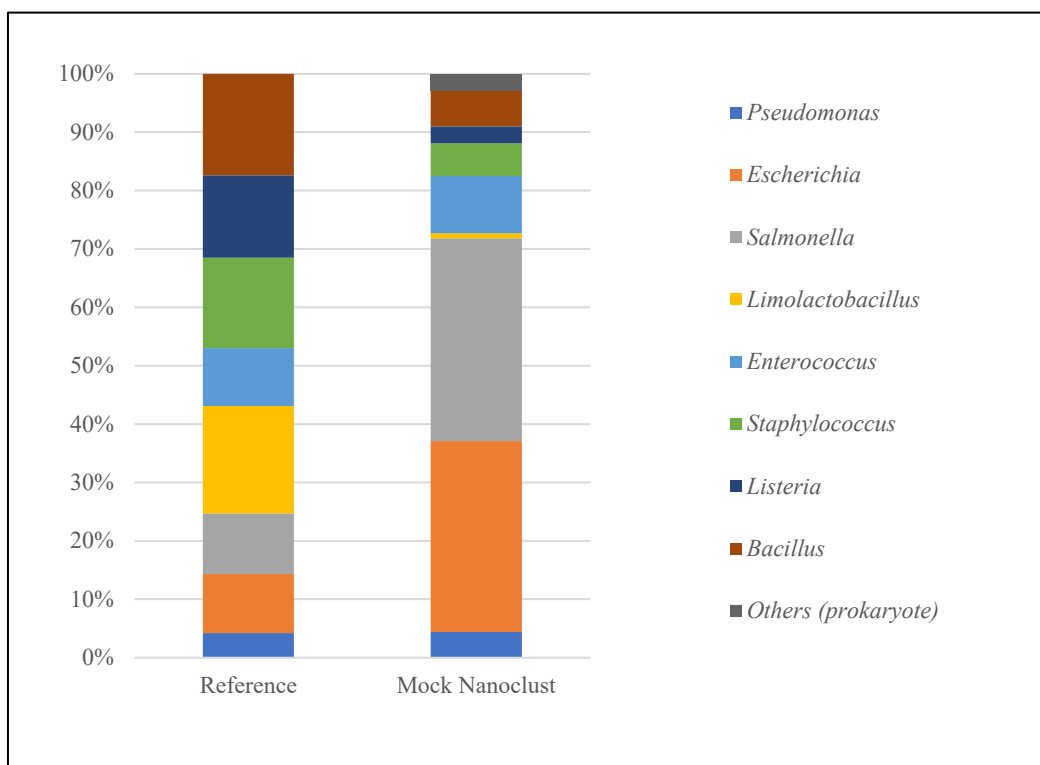

**Figure S5.** Mock community composition
