# Supplementary material for: Atlantic Salmon (Salmo salar) Transfer to Seawater by Gradual Salinity Changes Exhibited an Increase in The Intestinal Microbial Abundance and Richness
Source: MDPI journal article supplement (doi:10.3390/microorganisms11010076), 2022-12-27
Supplement: s1 [file s1]

**Table S3.** Bray-Curtis similarities for intestine samples calculated on R with Vegan Package.

|                  | <b>FW</b> | <b>10PSU-GSC</b> | <b>20PSU-GSC</b> | <b>32PSU-GSC</b> | <b>32PSU-SS</b> |
|------------------|-----------|------------------|------------------|------------------|-----------------|
| <b>10PSU-GSC</b> | 0.9122202 |                  |                  |                  |                 |
| <b>20PSU-GSC</b> | 0.8767837 | 0.6564537        |                  |                  |                 |
| <b>32PSU-GSC</b> | 0.6864566 | 0.9405967        | 0.8746218        |                  |                 |
| <b>32PSU-SS</b>  | 0.8784126 | 0.9771927        | 0.9612655        | 0.6726891        |                 |
| <b>32PSU-FD</b>  | 0.8491341 | 0.9768470        | 0.9432824        | 0.7866374        | 0.7323160       |

FW: Freshwater previous treatment group, GSC: gradual salinity change at 10 PSU, 20 PSU, and 32 PSU groups; 32PSU-SS Salinity shock at 32-PSU group; 32PSU-FD: Salinity shock at 32 PSU group previously feeding with a functional diet.
