# Supplementary material for: Atlantic Salmon (Salmo salar) Transfer to Seawater by Gradual Salinity Changes Exhibited an Increase in The Intestinal Microbial Abundance and Richness
Source: MDPI journal article supplement (doi:10.3390/microorganisms11010076), 2022-12-27
Supplement: s1 [file s1]

**Table S4.** NanoCLUST average percent identity of Clusters at the species level. Species with percentage of identity  $\geq 98.7$  based on the full sequence of 16S rRNA gene and relative abundance  $\geq 0.2\%$ .

| Species identifies<br>by NanoCLUST    | FW              | Average identity (%) $\pm$ SD |                 |                 |                 |                 |
|---------------------------------------|-----------------|-------------------------------|-----------------|-----------------|-----------------|-----------------|
|                                       |                 | 10PSU-<br>GSC                 | 20PSU-<br>GSC   | 32PSU-<br>GSC   | 32PSU-<br>SS    | 32PSU-<br>FD    |
| <i>Acidovorax radialis</i>            |                 |                               | 99.2 $\pm$ 0.00 |                 |                 |                 |
| <i>Acinetobacter johnsonii</i> *      | 95.2 $\pm$ 3.67 | 95.3 $\pm$ 3.85               | 91.5 $\pm$ 0.00 | 93.4 $\pm$ 2.29 | 99.3 $\pm$ 0.00 | 99.2 $\pm$ 0.00 |
| <i>Akkermansia muciniphila</i>        |                 | 99.2 $\pm$ 0.00               |                 |                 |                 |                 |
| <i>Aliivibrio wodanis</i> *           |                 |                               |                 | 99.0 $\pm$ 0.00 |                 |                 |
| <i>Alistipes onderdonkii</i>          |                 | 91.6 $\pm$ 3.15               | 99.0 $\pm$ 0.00 |                 |                 |                 |
| <i>Alistipes putredinis</i>           |                 | 94.1 $\pm$ 7.42               | 99.8 $\pm$ 0.00 |                 |                 |                 |
| <i>Anaerostipes glycerini</i>         |                 |                               | 99.4 $\pm$ 0.00 |                 |                 |                 |
| <i>Arcobacter venerupis</i>           |                 | 99.6 $\pm$ 0.00               |                 |                 |                 |                 |
| <i>Bacillus cereus</i>                | 99.1 $\pm$ 0.00 |                               |                 |                 |                 | 99.8 $\pm$ 0.00 |
| <i>Bacteroides caccae</i>             |                 | 99.4 $\pm$ 0.00               |                 |                 |                 |                 |
| <i>Bradyrhizobium mercantei</i>       | 99.0 $\pm$ 0.00 |                               |                 |                 |                 |                 |
| <i>Bradyrhizobium rifense</i>         |                 | 99.4 $\pm$ 0.00               |                 |                 |                 |                 |
| <i>Cloacibacterium caeni</i>          |                 | 99.5 $\pm$ 0.00               |                 |                 |                 |                 |
| <i>Cloacibacterium normanense</i>     |                 |                               | 99.4 $\pm$ 0.00 |                 |                 |                 |
| <i>Cutibacterium acnes</i>            |                 | 99.7 $\pm$ 0.00               | 99.9 $\pm$ 0.00 |                 |                 |                 |
| <i>Elizabethkingia anophelis</i>      |                 |                               |                 |                 |                 | 99.0 $\pm$ 0.00 |
| <i>Eubacterium rectale</i>            |                 | 99.5 $\pm$ 0.00               |                 |                 |                 |                 |
| <i>Flavobacterium cheniae</i>         |                 | 99.3 $\pm$ 0.00               |                 |                 |                 |                 |
| <i>Flavobacterium succinicans</i> *   |                 | 98.1 $\pm$ 7.25               | 98.8 $\pm$ 4.22 |                 |                 |                 |
| <i>Heliomonas saccharivorans</i>      |                 |                               |                 |                 |                 | 98.9 $\pm$ 0.00 |
| <i>Herbaspirillum huttiense</i>       |                 |                               |                 |                 |                 | 99.0 $\pm$ 0.00 |
| <i>Lactococcus raffinolactis</i>      |                 | 93.0 $\pm$ 0.49               | 99.5 $\pm$ 0.00 |                 |                 |                 |
| <i>Megasphaera massiliensis</i>       |                 | 99.1 $\pm$ 0.00               |                 |                 |                 |                 |
| <i>Methylobacterium brachiatum</i>    |                 |                               |                 | 99.1 $\pm$ 0.00 |                 |                 |
| <i>Methylobacterium radiotolerans</i> | 97.5 $\pm$ 0.00 |                               |                 |                 |                 |                 |
| <i>Microbacterium ginsengisoli</i>    | 99.6 $\pm$ 0.00 | 99.8 $\pm$ 0.00               |                 |                 |                 |                 |

|                                            |           |           |           |           |            |
|--------------------------------------------|-----------|-----------|-----------|-----------|------------|
| <i>Microbacterium mangrovi</i>             |           |           |           | 94.6±0.00 |            |
| <i>Micrococcus luteus</i>                  |           |           |           | 99.7±0.00 |            |
| <i>Moraxella osloensis</i>                 | 98.6±0.00 | 98.6±0.00 |           | 99.3±0.00 | 99.0±0.00  |
| <i>Morganella morganii</i>                 |           | 97.6±1.60 | 98.7±0.00 |           |            |
| <i>Paraburkholderia fungorum</i>           |           |           |           | 98.5±0.00 | 99.2±0.00  |
| <i>Pelomonas saccharophila</i>             |           |           |           |           | 99.1±0.00  |
| <i>Phascolarctobacterium succinatutens</i> |           | 99.0±0.00 |           |           |            |
| <i>Phocaeicola coprocola</i>               |           | 99.2±0.00 |           |           |            |
| <i>Providencia rettgeri</i> *              |           | 98.9±0.00 |           |           |            |
| <i>Pseudomonas brenneri</i>                |           | 99.4±0.00 |           |           |            |
| <i>Pseudomonas cedrina</i>                 |           |           |           |           | 99.4±0.00  |
| <i>Pseudomonas migulae</i>                 | 98.5±0.00 | 99.1±0.00 | 95.5±0.00 | 99.3±0.00 |            |
| <i>Rahnella aquatilis</i>                  |           | 99.2±0.00 |           |           |            |
| <i>Ralstonia insidiosa</i>                 |           |           |           |           | 99.4±0.00  |
| <i>Rhizobium zoeae</i>                     | 99.6±0.00 | 99.4±0.00 |           |           |            |
| <i>Shigella flexneri</i>                   | 97.3±2.47 | 99.5±0.00 | 97.0±3.38 | 95.9±0.34 |            |
| <i>Shigella sonnei</i>                     |           |           | 93.5±0.00 | 98.9±0.00 |            |
| <i>Sphingobium yanoikuyae</i>              |           |           |           | 99.5±0.00 |            |
| <i>Staphylococcus aureus</i>               |           |           | 99.6±0.00 | 96.9±0.00 |            |
| <i>Streptococcus thermophilus</i>          | 99.8±0.00 |           | 99.5±0.00 | 98.9±0.00 |            |
| <i>Thermosiphon melanesiensis</i>          |           |           |           |           | 100.0±0.00 |
| <i>Uruburuella suis</i>                    |           | 99.6±0.00 |           |           |            |

SD: Standard deviation; \*indicate fish-pathogenic bacteria. FW: Freshwater previous treatment group, GSC: gradual salinity change at 10 PSU, 20 PSU and 32 PSU groups; 32PSU-SS Salinity shock at 32-PSU group; 32PSU-FD: Salinity shock at 32 PSU group previously feeding with a functional diet.
