# Supplementary material for: Atlantic Salmon (Salmo salar) Transfer to Seawater by Gradual Salinity Changes Exhibited an Increase in The Intestinal Microbial Abundance and Richness
Source: MDPI journal article supplement (doi:10.3390/microorganisms11010076), 2022-12-27
Supplement: s1 [file s1]

**Table S1.** Sequencing data report

| <b>PycoQC sequencing report</b>           |                      |                       |                                      |                   |                         |
|-------------------------------------------|----------------------|-----------------------|--------------------------------------|-------------------|-------------------------|
| <b>Run</b>                                | <b>Reads</b>         | <b>Pass reads</b>     | <b>Bases</b>                         | <b>N50 length</b> | <b>Med Read Quality</b> |
| Run1                                      | 1.057.010            | 572.635               | 233.406.176                          | 477               | 8,15                    |
| Run2                                      | 3.687.103            | 2.513.372             | 1.100.488.945                        | 434               | 8,76                    |
| Run3                                      | 4.077.332            | 2.781.903             | 1.220.612.486                        | 444               | 8,99                    |
| Total                                     | 8.821.445            | 5.867.910             | 2.554.507.607                        |                   |                         |
| <b>Classification report by treatment</b> |                      |                       |                                      |                   |                         |
|                                           | <b>Pass Porechop</b> | <b>Pass NanoCLUST</b> | <b>Pass NanoCLUST classification</b> |                   |                         |
| Mock                                      | 723.496              | 13.162                | 11.527                               |                   |                         |
| FW                                        | 406.455              | 5.139                 | 4.920                                |                   |                         |
| 10 PSU-GSC                                | 198.492              | 38.488                | 30.835                               |                   |                         |
| 20 PSU-GSC                                | 150.384              | 49.368                | 35.524                               |                   |                         |
| 32 PSU-GSC                                | 393.174              | 8.163                 | 5.594                                |                   |                         |
| 32 PSU-FD                                 | 553.295              | 2.180                 | 2.051                                |                   |                         |
| 32 PSUSS                                  | 285.080              | 3.047                 | 2.709                                |                   |                         |
| Total                                     | 2.710.376            | 119.547               | 93.160                               |                   |                         |

FW: Freshwater previous treatment group, GSC: gradual salinity change at 10 PSU, 20 PSU and 32 PSU groups; 32PSU-SS Salinity shock at 32-PSU group; 32PSU-FD: Salinity shock at 32 PSU group previously feeding with a functional diet.
